# Supplementary material for: High sulfur content microporous carbon coated sulfur composites synthesized via in situ oxidation of metal sulfide for high-performance Li/S batteries
Source: Royal Society of Chemistry journal article supplement (doi:10.1039/c6ta10163a), 2016-12-29
Supplement: c6ta10163a1.pdf [file c6ta10163a1.pdf]

## Supporting Information

High sulfur content microporous carbon coated sulfur composite synthesized  
via in-situ oxidation of metal sulfide for high-performance Li/S battery

*Qian Wang, Zhen-Bo Wang,\* Chao Li, Da-Ming Gu*

School of Chemistry and Chemical Engineering, Harbin Institute of Technology, No. 92 West-Da  
Zhi Street, Harbin, 150001 China

\*Corresponding author, E-mail: wangzhibo@hit.edu.cn (Z.B. Wang)

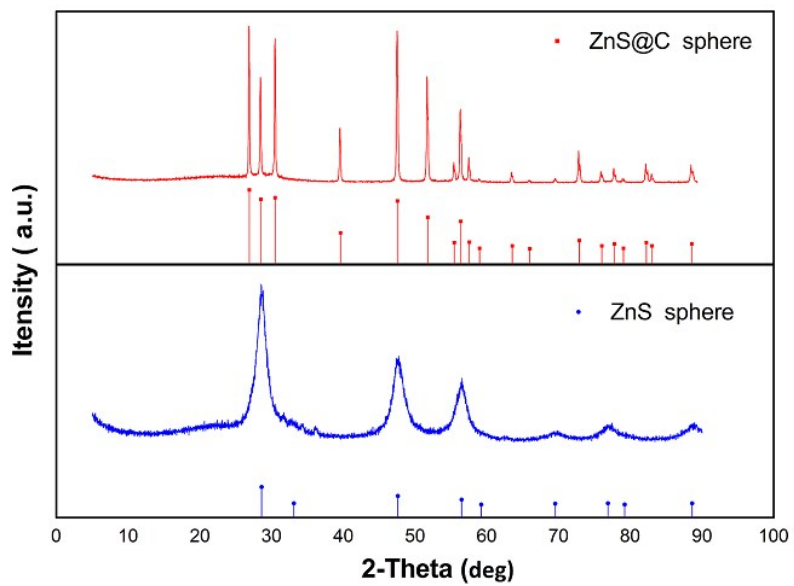

**Figure S1.** X-ray diffraction patterns of ZnS and ZnS@MPC-2

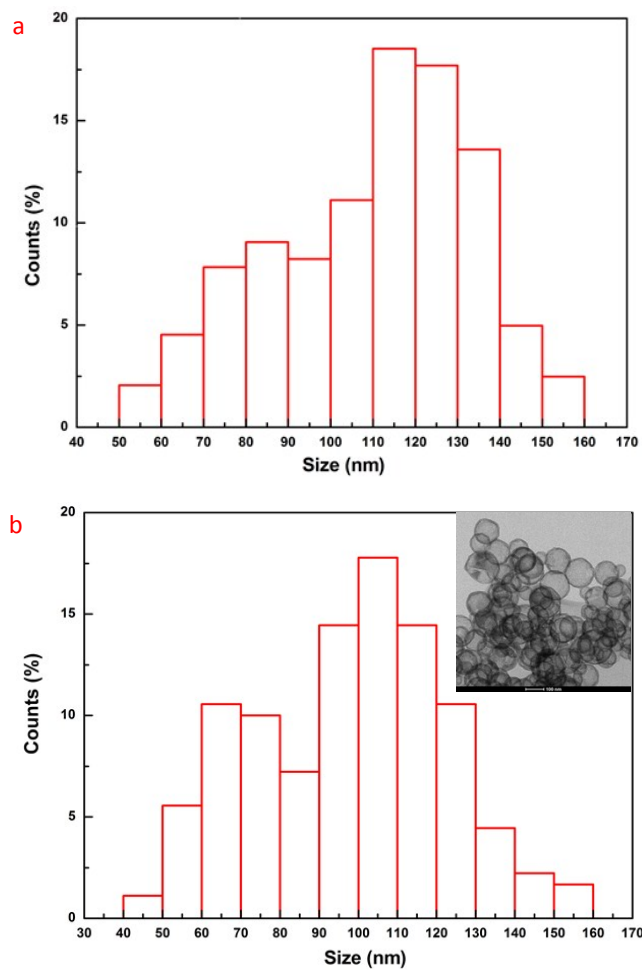

**Figure S2.** (a) Particle size distribution histograms of ZnS. (b) inner pore diameter size distribution of MPC-HS. The inset shows the TEM of MPC-HS. Scale bar, 100 nm.

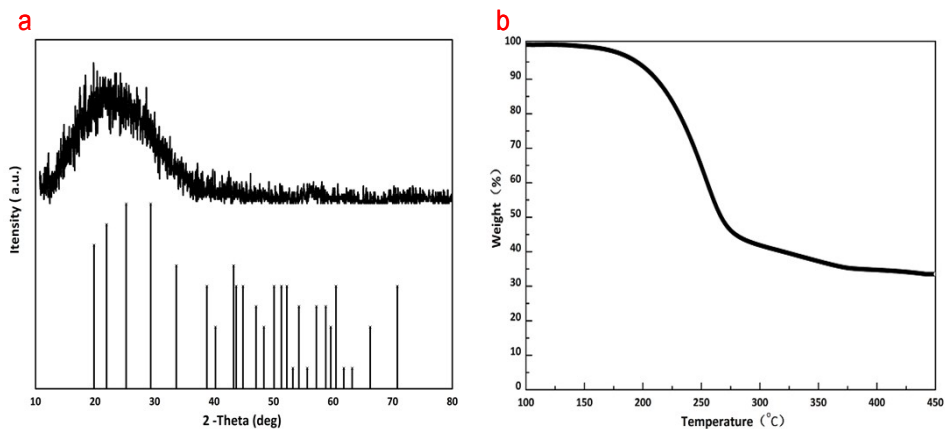

**Figure S3.** (a) X-ray diffraction pattern, (b) thermal gravimetric analysis of S@MPC-DHS-2

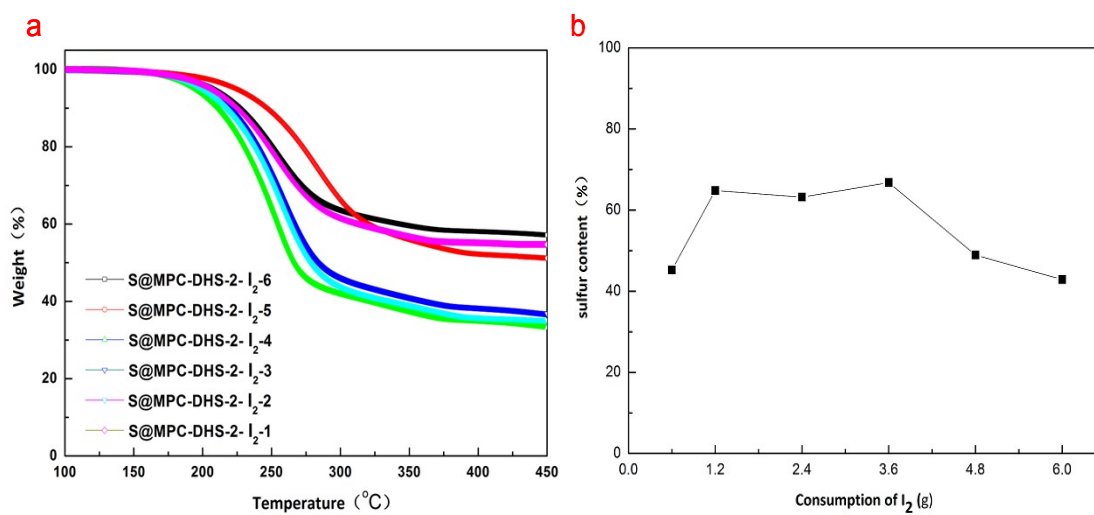

**Figure S4.** (a) The thermal gravimetric analysis of the S@MPC-DHS-I<sub>2</sub>, (b) The sulfur content of S@MPC-DHS-I<sub>2</sub> corresponding to the consumption of I<sub>2</sub> in preparation process.

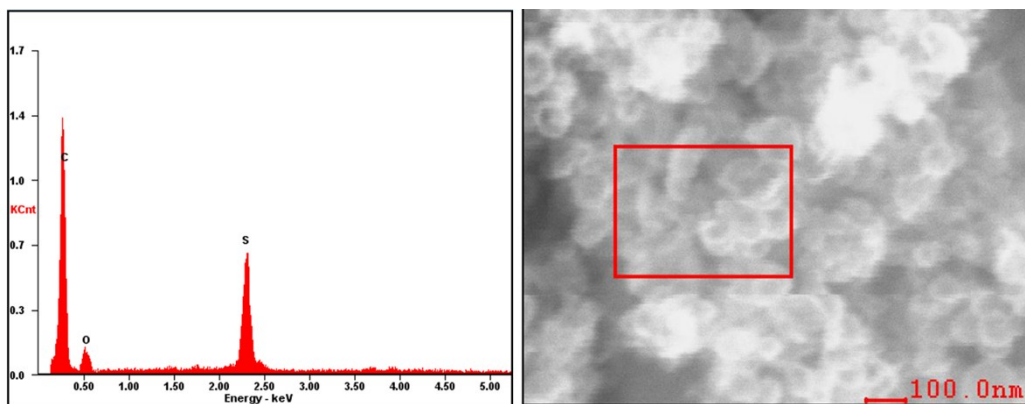

**Figure S5.** The EDX data of S@MPC-DHS-2.

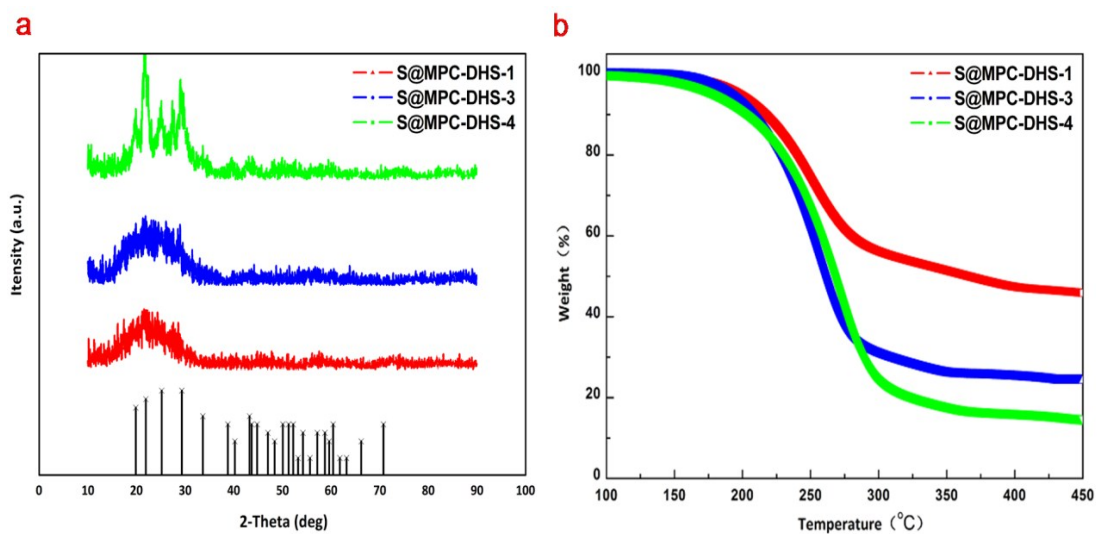

**Figure S6.** (a) X-ray diffraction pattern, (b) thermal gravimetric analysis of S@MPC-DHS.

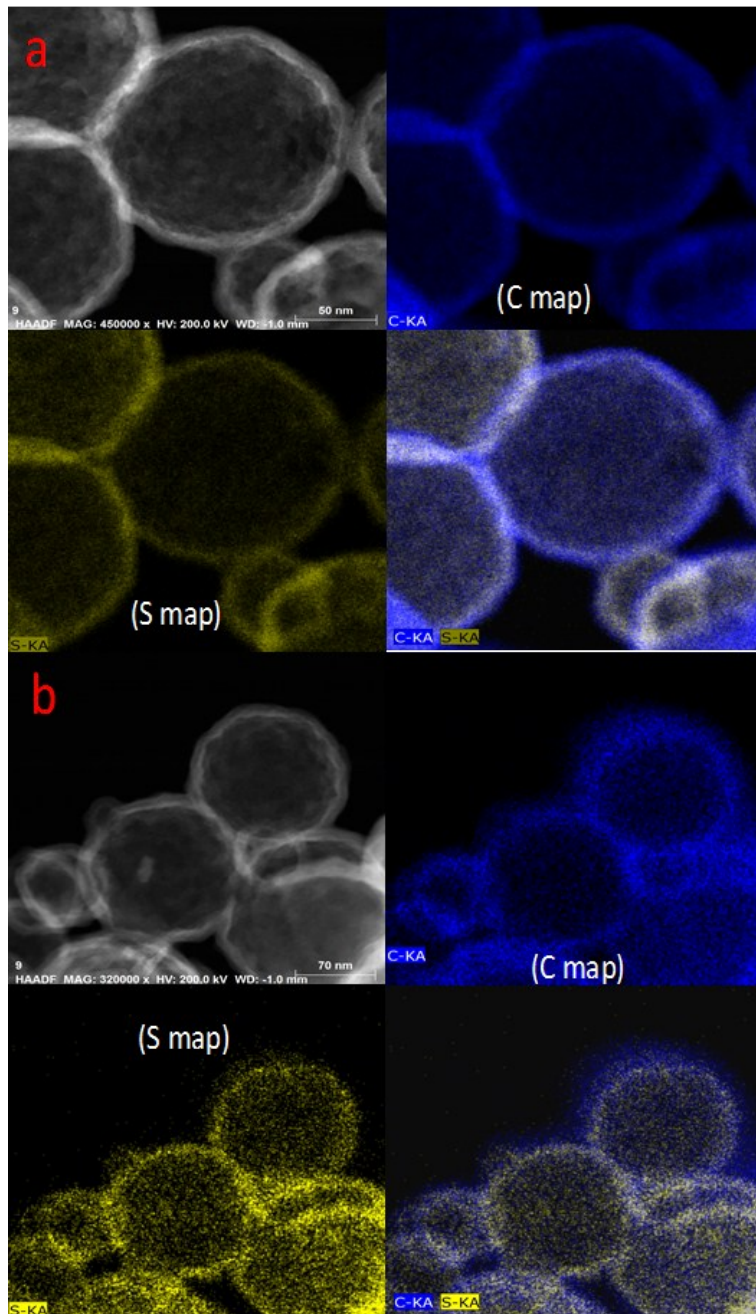

**Figure S7.** HAADF and EDX element mapping of (a) S@MPC-DHS-1, (b) S@MPC-DHS-3.

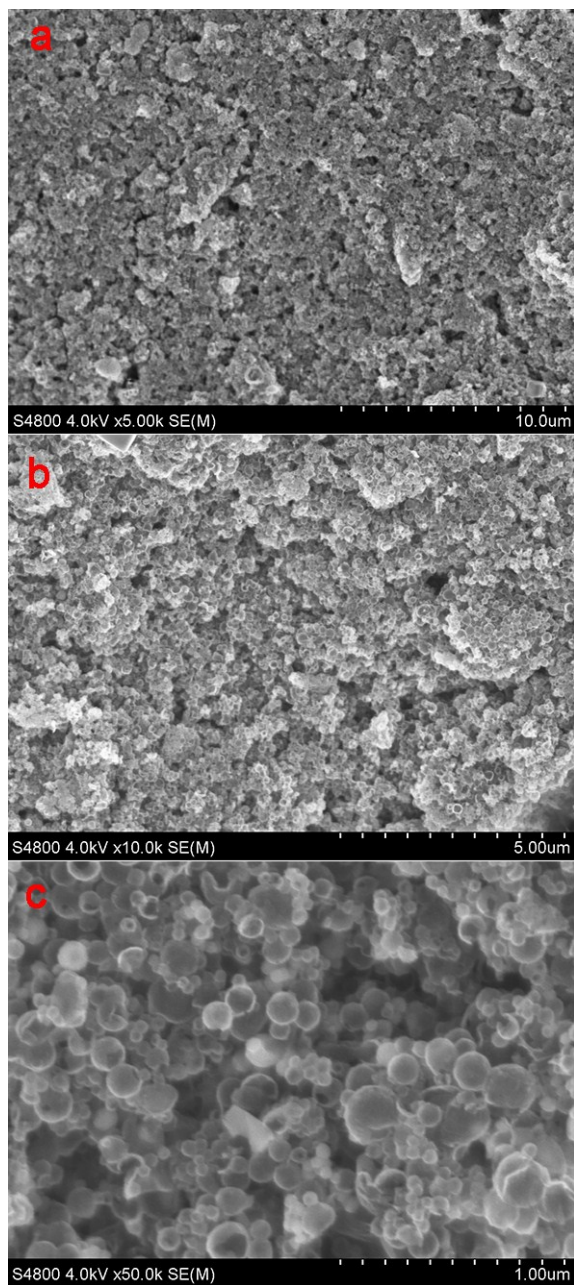

**Figure S8.** The electrode SEM images of S@MPC-DHS-3 at the magnifications of (a) 5 k, (b) 10 k, and (c) 50 k.

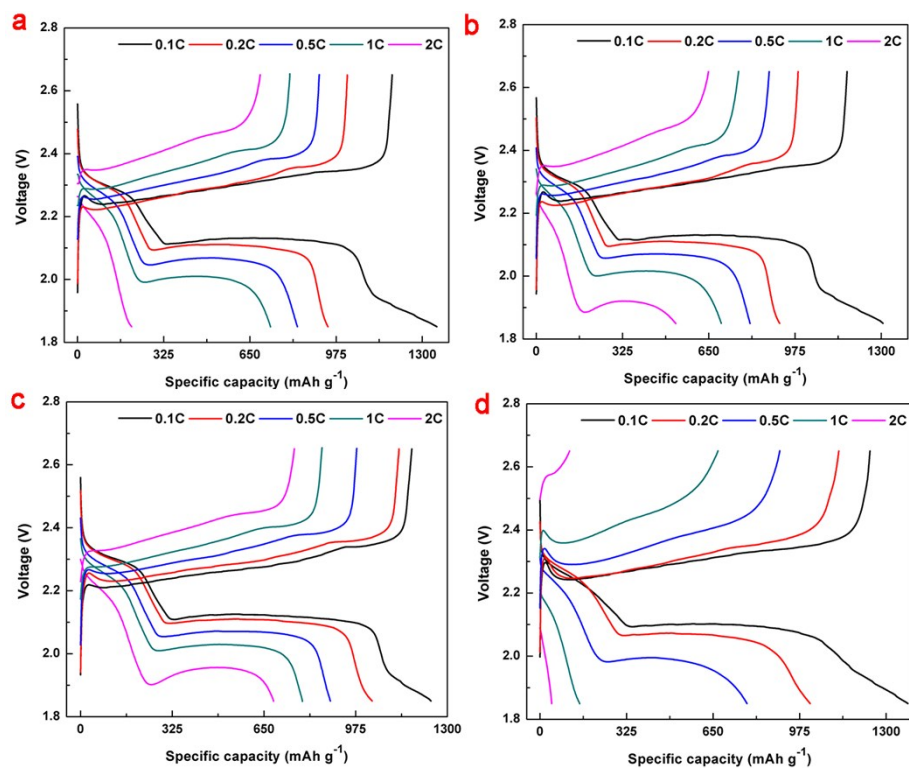

**Figure S9.** The charge-discharge curves of (a) S@MPC-DHS-1, (b) S@MPC-DHS-2, (c) S@MPC-DHS-3, and (d) S@MPC-DHS-4 at different current rates.



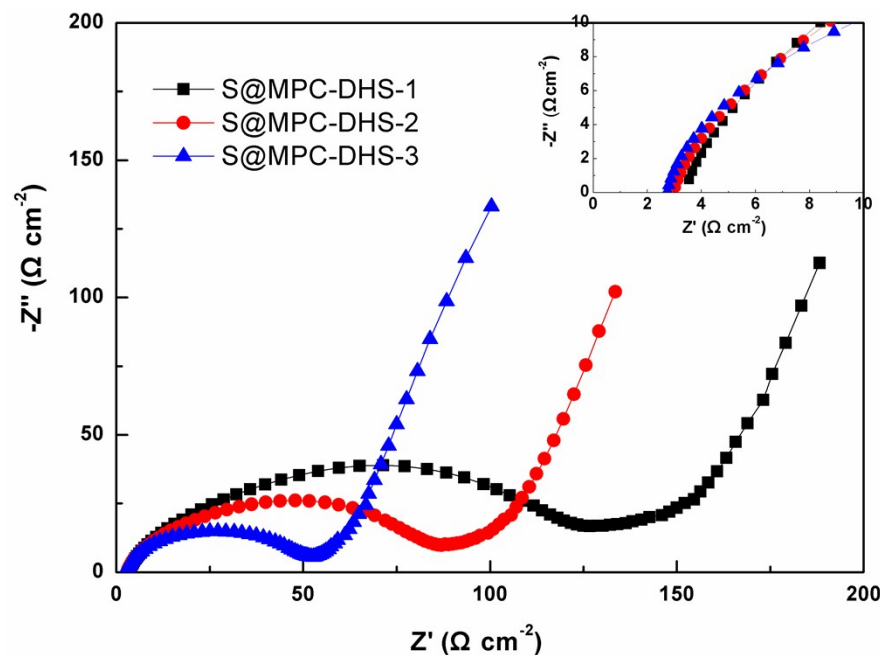

**Figure S10.** Electrochemical impedance spectroscopy (EIS) of S@MPC-DHS-1, S@MPC-DHS-2 and S@MPC-DHS-3.

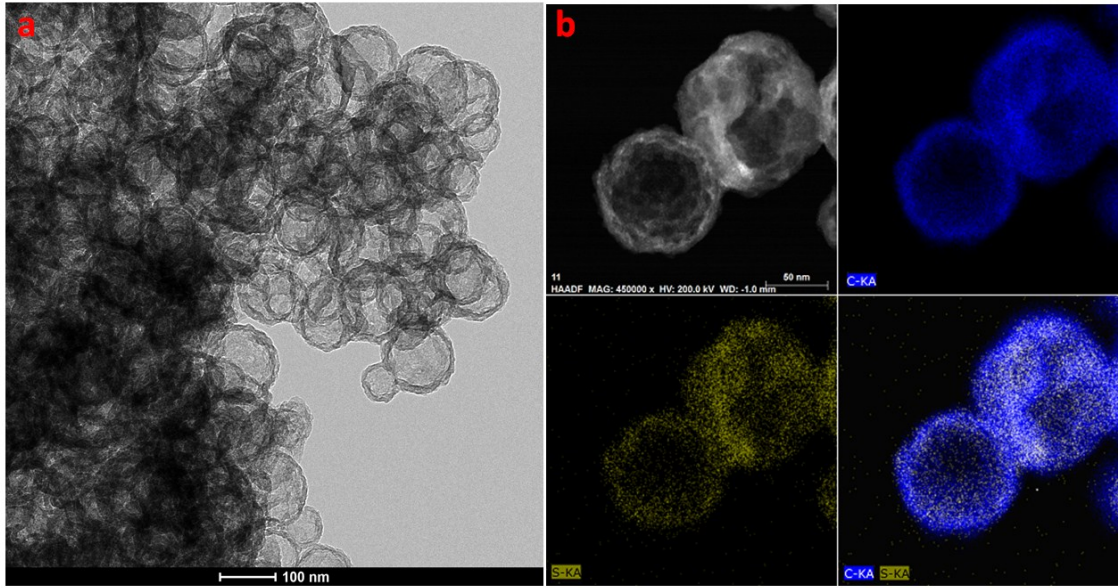

**Figure S11.** (a) The TEM and (b) HAADF and EDX element mapping of the S@MPC-DHS-3 after 1000 cycles in cells.

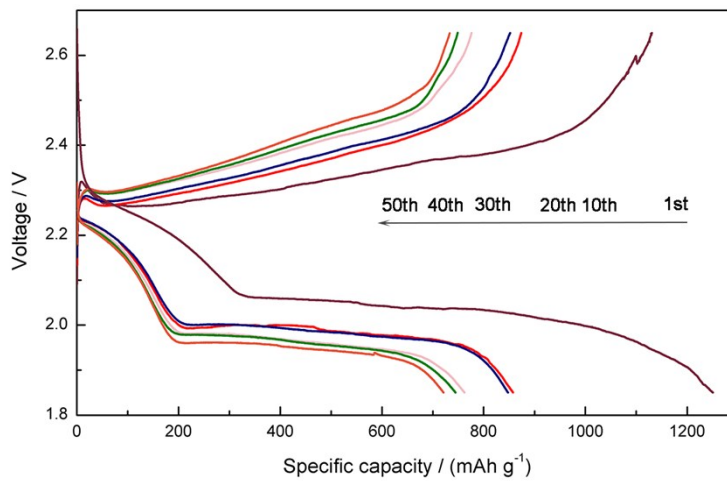

**Figure S12.** The charge-discharge curves of S@MPC-DHS-3 at 0.05 C-rates under the sulfur loading of  $4.4 \text{ mg cm}^{-2}$ .

Table S1. The performance parameters comparison of the reported similar materials

| Type                                    | Initial discharge capacity (mAh g <sup>-1</sup> ) | Reversible discharge capacity (mAh g <sup>-1</sup> ) | Current rate (mAh g <sup>-1</sup> ) | Number of cycles | S loading (mg cm <sup>-2</sup> ) | Sulfur impregnation | Ref.      |
|-----------------------------------------|---------------------------------------------------|------------------------------------------------------|-------------------------------------|------------------|----------------------------------|---------------------|-----------|
| Porous hollow carbon spheres            | 1020                                              | 690                                                  | 0.1 C                               | 100              | -                                | 400 °C              | [1]       |
| Porous hollow carbon spheres            | 850                                               | 580                                                  | 0.2 C                               | 500              | 2.5                              | 140 °C              | [2]       |
| Mesoporous Porous hollow carbon spheres | 972                                               | 875                                                  | 1 C                                 | 100              | 1.12-1.4                         | 155 °C              | [3]       |
| Yolk-Shell Structure                    | 919                                               | 628                                                  | 0.5 C                               | 200              | 2                                | 180 °C              | [4]       |
| Hierarchical Porous Carbon              | 1163.9                                            | 665                                                  | 0.5 C                               | 200              | 1                                | 155 °C              | [5]       |
|                                         | 1049                                              | 512.2                                                | 2 C                                 | 200              |                                  |                     |           |
|                                         | 753.2                                             | 343.8                                                | 4 C                                 | 200              |                                  |                     |           |
| Nitrogen-Doped Hollow Carbon            | 740                                               | 630                                                  | 0.6 C                               | 600              | 1.5                              | 160 °C              | [6]       |
| Double-Shelled Hollow Carbon Spheres    | 838.7                                             | 520                                                  | 0.5 C                               | 200              | 3.9 (vacuum filtration)          | 155 °C              | [7]       |
| Pomegranate-Like Cluster Structure      | 1010                                              | 707                                                  | 0.5 C                               | 300              | 2                                | 155 °C              | [8]       |
| Microporous hollow carbon spheres       | 800                                               | 400                                                  | 1 C                                 | 1000             | 0.6-0.9                          | 25 °C               | this work |
|                                         | 1017                                              | 750                                                  | 0.1 C                               | 100              | 2.3                              |                     |           |

## REFERENCE

- 1 G. He, S. Evers, X. Liang, M. Cuisinier, A. Garsuch, L.F. Nazar, *ACS Nano*, 2013, 7, 10920.
- 2 C. Zhang, H.B. Wu, C. Yuan, Z. Guo, X.W. Lou, *Angew. Chem., Int. Ed.*, 2012, 51, 9592.
- 3 G. Zhou, Y. Zhao, A. Manthiram, *Adv. Energ. Mater.* , 2015, 5, 1402263.
- 4 W. Zhou, Y. Yu, H. Chen, F.J. DiSalvo, H.D. Abruna, *J. Am. Chem. Soc.*, 2013, 135, 16736.
- 5 W. Li, Z. Liang, Z. Lu, H. Yao, Z.W. Seh, K. Yan, G. Zheng, Y. Cui, *Adv. Energ. Mater.* , 2015, 5 , 1500211.
- 6 F.F. Zhang, G. Huang, X.X. Wang, Y.L. Qin, X.C. Du, D.M. Yin, F. Liang, L.M. Wang, *Chem. Eur. J.* , 2014, 20, 17523.
- 7 F. Boettger-Hiller, P. Kempe, G. Cox, A. Panchenko, N. Janssen, A. Petzold, T. Thurn-Albrecht, L. Borchardt, M. Rose, S. Kaskel, C. Georgi, H. Lang, S. Spange, *Angew. Chem., Int. Ed.*, 2013, 52 ,6088.
- 8 W. Zhou, X. Xiao, M. Cai, L. Yang, *Nano Lett*, 2014, 14, 5250.
